# Supplementary material for: Distinct functions of EHMT1 and EHMT2 in cancer chemotherapy and immunotherapy
Source: PubMed Central journal article supplement — bioRxiv. 2023 Oct 4:2023.10.03.560719. Preprint. [Version 1] doi: 10.1101/2023.10.03.560719 (PMC10592889; doi:10.1101/2023.10.03.560719), 2023-10-04
Supplement: NIHPP2023.10.03.560719v1-supplement-1.pdf [file NIHPP2023.10.03.560719v1-supplement-1.pdf]

## Supplementary Table 1. Sequences of the siRNAs and primers in this study

The sequences of the sense strands of the siRNA used are as follows,

|            |                             |
|------------|-----------------------------|
| NSC1       | UUCGAACGUGUCACGUCAA[dT][dT] |
| EHMT1-437  | GCACAGCCCUUGAGGACUA[dT][dT] |
| EHMT1-869  | CAGCUGCAGUAUCUCGGAA[dT][dT] |
| EHMT2-2202 | ACAUAAAUGCAGUGGACAA[dT][dT] |
| EHMT2-3985 | CCAACUGGUUCCUUUUGUU[dT][dT] |
| LIG1-989   | GGAAGAUGCCUGCUGGAAA[dC][dG] |
| LIG1-1659  | GGCAUGAUCCUGAAGCAGA[dT][dT] |
| UHRF1-3597 | AGAUUAACGUUAGGGUUU[dT][dT]  |
| UHRF1-3670 | UCACAUACCUGCAGACAAA[dT][dT] |

The sequences of qRT-PCR primers are as follows,

|                 |                                                 |
|-----------------|-------------------------------------------------|
| <i>GAPDH</i> :  | CGACCACTTTGTCAAGCTCA<br>AGGGGTCTACATGGCAACTG    |
| <i>CGAS</i> :   | GCCGCCGTGGAGATATCAT<br>GGCGGTTTTGGAGAAGTTGA     |
| <i>STING1</i> : | ATATCTGCGGCTGATCCTGC<br>TTGTAAGTTCTGAATCCGGGC   |
| <i>IFNA</i> :   | AATGACAGAATTCATGAAAGCGT<br>GGAGGTTGTCAGAGCAGA   |
| <i>IFNB</i> :   | GCCATCAGTCACTTAAACAGC<br>GAAACTGAAGATCTCCTAGCCT |
| <i>CXCL9</i> :  | CCAGTAGTGAGAAAGGGTCGC<br>AGGGCTTGGGGCAAATTGTT   |
| <i>CXCL10</i> : | GCCTTCGATTCTGGATTTCAG<br>GTGGCATTCAAGGAGTACCTC  |

The sequences of bisulfite sequencing PCR primers are as follows,

|                   |                                                         |
|-------------------|---------------------------------------------------------|
| <i>STING1</i> me: | GATGGGGTTTTATTATGTTGTTTAG<br>AAAAATAAAAAATAACAATTATTTCC |
|-------------------|---------------------------------------------------------|

## Supplementary Table 2. Antibodies for WB, IHC and IF used in this study

| Antibody         | WB       | IHC   | IF    | Company        | Identifier |
|------------------|----------|-------|-------|----------------|------------|
| H3K9me2          | 1:3000   | -     | -     | Sigma          | 07-441     |
| H3               | 1:5000   | -     | -     | Santa Cruz     | sc-517576  |
| EHMT1            | 1:3000   | -     | -     | Cell Signaling | 35005S     |
| EHMT2            | 1:3000   | -     | -     | Proteintech    | 66689-1-Ig |
| GAPDH            | 1:500000 | -     | -     | Proteintech    | 60004-1-Ig |
| UHRF1            | 1:3000   | -     | -     | Proteintech    | 21402-1-AP |
| LIG1             | 1:5000   | -     | -     | Proteintech    | 67840-1-Ig |
| γH2AX(Ser139)    | 1:4000   | 1:500 | -     | Sigma          | 05-636     |
| LIG3             | 1:3000   | -     | -     | Proteintech    | 26583-1-AP |
| MCM4             | 1:3000   | -     | -     | Santa Cruz     | sc-48407   |
| MCM10            | 1:3000   | -     | -     | Proteintech    | 12251-1-AP |
| CDC45            | 1:3000   | -     | -     | Santa Cruz     | sc-55569   |
| PCNA             | 1:6000   | -     | -     | Cell Signaling | 13110S     |
| p-KAP1(Ser824)   | 1:3000   | -     | -     | Bethyl         | ab48508    |
| KAP1             | 1:6000   | -     | -     | Proteintech    | 66630-1-Ig |
| p-CBK2 (Thr68)   | 1:3000   | -     | -     | Cell Signaling | 2197S      |
| CHK2             | 1:3000   | -     | -     | Cell Signaling | MA5-32450  |
| RPA32            | 1:6000   | -     | -     | Santa Cruz     | sc-56770   |
| STING            | 1:3000   | 1:200 | -     | Cell Signaling | 13647      |
| cGAS             | 1:3000   | -     | -     | Cell Signaling | 79978S     |
| CldU             | -        | -     | 1:300 | Abcam          | ab6326     |
| IdU              | -        | -     | 1:30  | BD biosciences | 347580     |
| BrdU             | -        | -     | 1:100 | BD biosciences | 347580     |
| RPA32            | -        | -     | 1:500 | Cell Signaling | 2208S      |
| Ki-67            | -        | 1:800 | -     | Cell Signaling | 12202      |
| Cleaved Caspase3 | -        | 1:200 | -     | Cell Signaling | 9661S      |

---

|                                      |        |        |       |                |           |
|--------------------------------------|--------|--------|-------|----------------|-----------|
| CD4                                  | -      | 1:1000 | -     | Abcam          | ab183685  |
| CD8                                  | -      | 1:200  | -     | Cell Signaling | 98941     |
| PD-L1                                |        | 1:200  |       | Thermofisher   | MA5-32450 |
| ECL Rabbit IgG                       | 1:6000 | -      | -     | Cytival        | NA934     |
| ECL Mouse IgG                        | 1:6000 | -      | -     | Cytival        | NA931     |
| Goat anti-Mouse IgG, Alexa Fluor 488 | -      | -      | 1:600 | Thermo fisher  | A-11029   |
| Goat anti-Rat IgG, Alexa Fluor 594   | -      | -      | 1:600 | Thermo fisher  | A-11007   |

---

### Supplementary Table 3. Drugs information used in this study

| <b>Drugs</b>            | <b>Company</b> | <b>Identifier</b> |
|-------------------------|----------------|-------------------|
| UNC0638                 | Selleckchem    | S8071             |
| UNC0642                 | Selleckchem    | S7230             |
| BrdU                    | Sigma          | B5002             |
| CldU                    | Sigma          | C6891             |
| IdU                     | Sigma          | I7125             |
| ATMi KU55933            | Selleckchem    | S1092             |
| ATMi KU60019            | Selleckchem    | S1570             |
| ATRi VE821              | Selleckchem    | S8007             |
| Bleomycin               | vwr            | 1076308           |
| Camptothecin            | Selleckchem    | S1288             |
| Cisplatin               | Sigma          | PHR1624           |
| Cyclophosphamide        | Selleckchem    | S2057             |
| Temozolomide            | Sigma          | PHR1437           |
| Mirin                   | Selleckchem    | S8096             |
| anti-mouse PD-1 (CD279) | Bioxcell       | BE0273            |
| rat IgG2a isotype       | Bioxcell       | BE0089            |
